# Supplementary material
Source: PubMed Central journal article supplement (PMC7288568)
Supplement: ao0c00649_si_001.pdf [file ao0c00649_si_001.pdf]

# **Effects of inulin propionate ester on obesity-related metabolic syndrome and intestinal microbial homeostasis in diet-induced obese mice**

Xiaozhen Zhu<sup>1,2</sup>, Xia Zhang<sup>1,2</sup>, Xuelu Gao<sup>2,3</sup>, Yuetao Yi<sup>\*, 1,5</sup>, Yang Hou<sup>7</sup>, Xianyao Meng<sup>1,2</sup>, Chenchen Jia<sup>1,2</sup>, Bo Chao<sup>6</sup>, Wenyong Fan<sup>6</sup>, Xinrui Li<sup>6</sup>, Hanhan Zhang<sup>\*,4</sup>

<sup>1</sup> Yantai Institute of Coastal Zone Research, Chinese Academy of Sciences, Yantai 264003, China

<sup>2</sup> University of Chinese Academy of Sciences, Beijing 100049, China

<sup>3</sup> CAS Key Laboratory of Coastal Environmental Processes and Ecological Remediation, Yantai Institute of Coastal Zone Research, Chinese Academy of Sciences, Yantai 264003, China

<sup>4</sup> Department of Biochemistry and Molecular Biology, Key Laboratory of Tumor Molecular Biology in Binzhou Medical University, Binzhou Medical University, Yantai, Shandong, 264003, China

<sup>5</sup> Center for Ocean Mega-Science, Chinese Academy of Sciences, 7 Nanhai Road, Qingdao, 266071, China

<sup>6</sup> School of Clinical Medicine at Binzhou Medical University, 264003, China

<sup>7</sup> Beijing Dongcheng District Food and Drug Safety Monitoring Center, Beijing 100050, China

\* Corresponding Author:

Email: [ytyi@yic.ac.cn](mailto:ytyi@yic.ac.cn) (Yuetao Yi)

Email: [bettyonline@163.com](mailto:bettyonline@163.com) (Hanhan Zhang)

Supporting information consists of 1 table (Tables S1) and 2 figures (Figure S1-S2)

**Table S1 The Diet composition of low-fat diet and high-fat diet.**

| Diet                     | Low-fat diet |       | High-fat diet |       |
|--------------------------|--------------|-------|---------------|-------|
|                          | gm%          | Kcal% | gm%           | Kcal% |
| Protein                  | 19.2         | 20    | 26.2          | 20    |
| Carbohydrate             | 67.3         | 70    | 26.3          | 20    |
| Fat                      | 4.3          | 10    | 34.9          | 60    |
| Total                    |              | 100   |               | 100   |
| Kcal/gm                  | 3.85         |       | 5.24          |       |
| Ingredient               | gm           | Kcal  | gm            | Kcal  |
| Casein, 80 Mesh          | 200          | 800   | 200           | 800   |
| L-Cystine                | 3            | 12    | 3             | 12    |
| Corn Starch              | 315          | 1260  | 0             | 0     |
| Maltodextrin 10          | 35           | 140   | 125           | 500   |
| Sucrose                  | 350          | 1400  | 68.8          | 275.2 |
| Cellulose, BW200         | 50           | 0     | 50            | 0     |
| Soybean Oil              | 25           | 225   | 25            | 225   |
| Lard*                    | 20           | 180   | 245           | 2205  |
| Mineral Mix S10026       | 10           | 0     | 10            | 0     |
| DiCalcium Phosphate      | 13           | 0     | 13            | 0     |
| Calcium Carbonate        | 5.5          | 0     | 5.5           | 0     |
| Potassium Citrate, 1 H2O | 16.5         | 0     | 16.5          | 0     |
| Vitamin Mix V1001        | 10           | 40    | 10            | 40    |
| Choline Bitartrate       | 2            | 0     | 2             | 0     |
| FD&C Blue Dye #1         |              |       | 0.05          | 0     |
| FD&C Yellow Dye #5       | 0.05         | 0     |               |       |
| Total                    | 1055.05      | 4057  | 773.85        | 4057  |

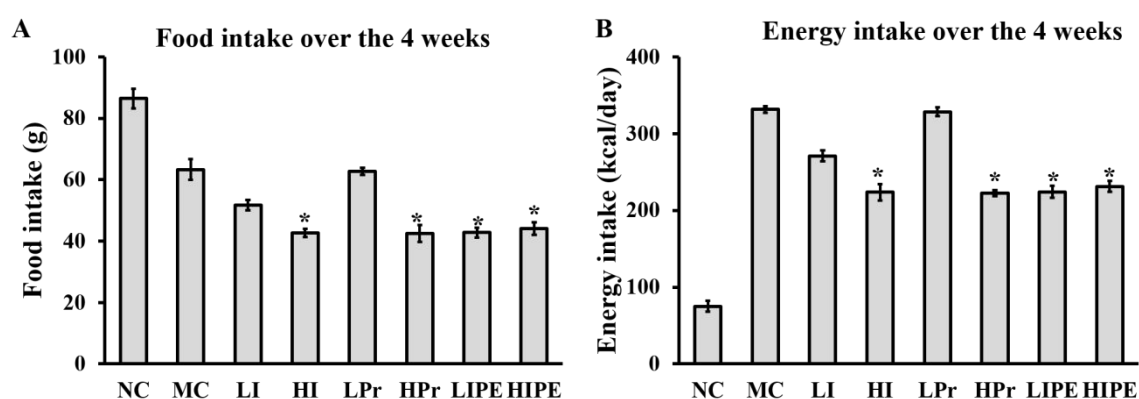

**Figure S1** The cumulative food and energy intake over the 4 weeks in different groups. (A) The food intake over the 4 weeks; (B) Energy intake over the 4 weeks. \*P < 0.05 versus MC.

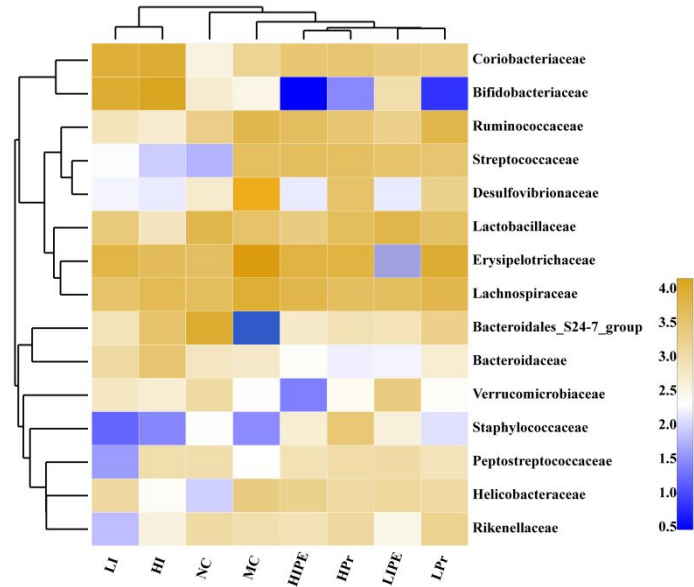

**Figure S2** Heat map analysis of microbial community composition at family level
